# Supplementary figures and images for: The NAC transcription factor family in Eucommia ulmoides: Genome-wide identification, characterization, and network analysis in relation to the rubber biosynthetic genes
Source: Frontiers journal article supplement (doi:10.3389/fpls.2023.1030298), 2023-04-03

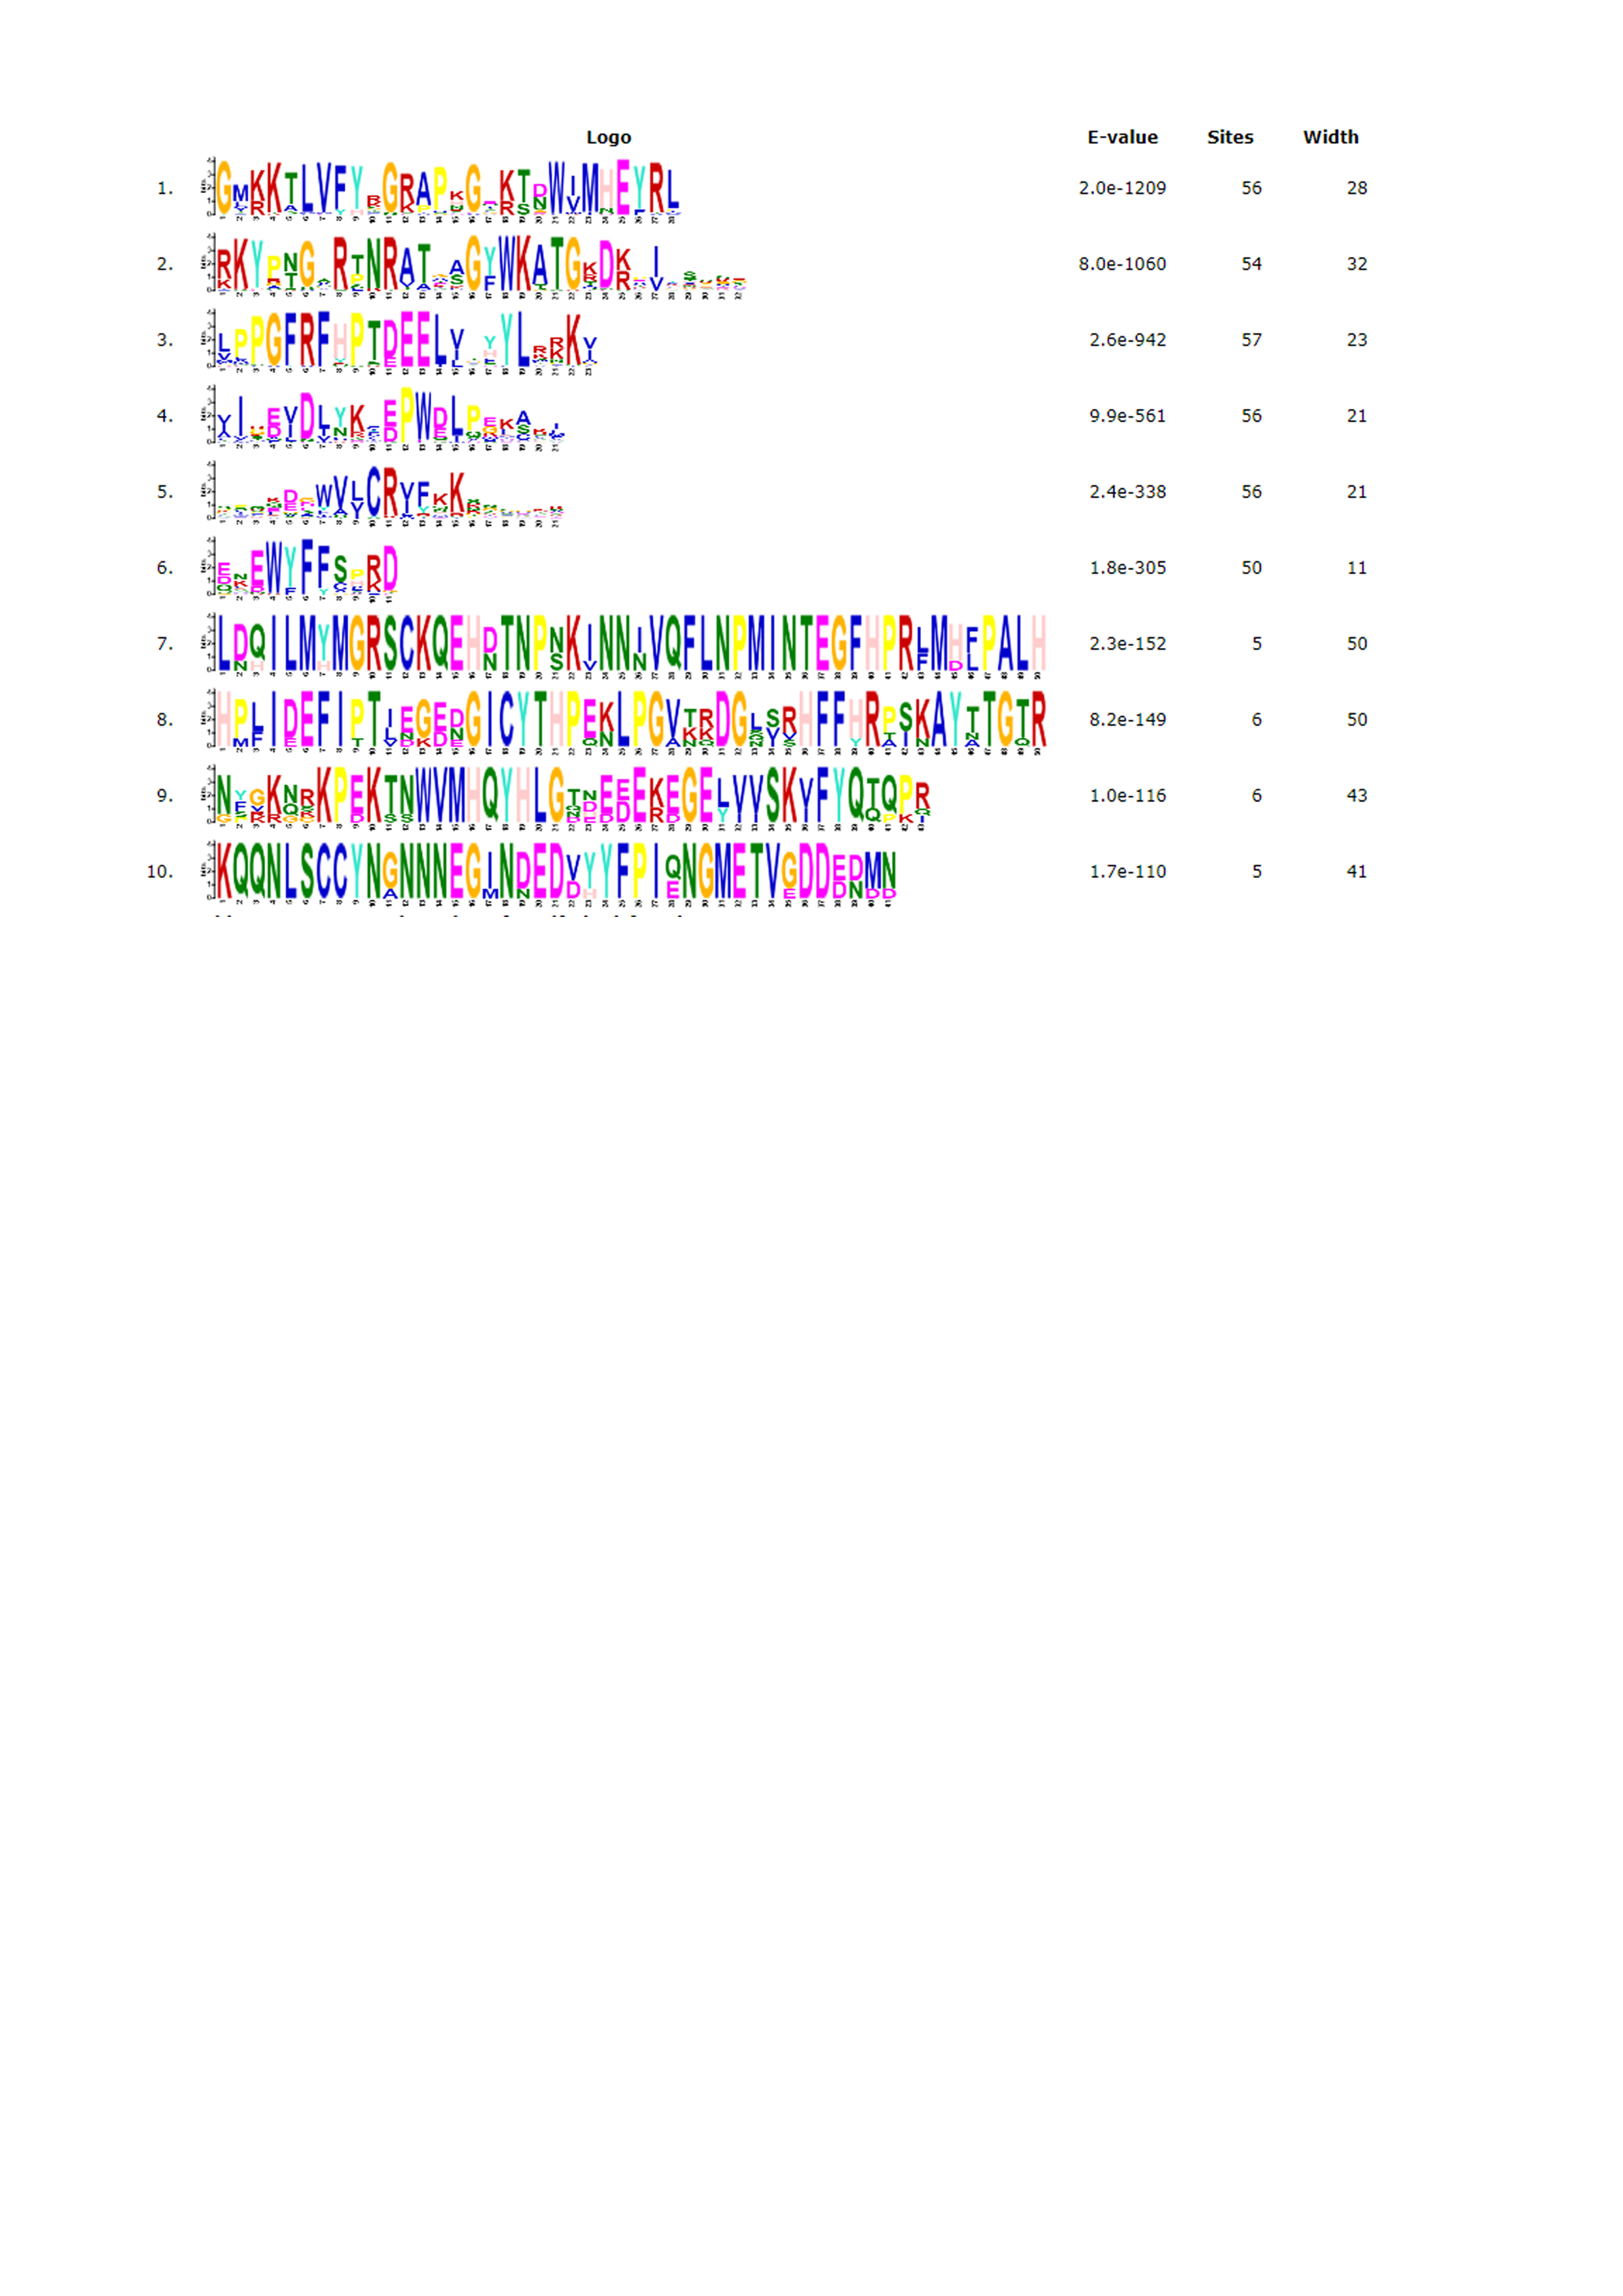


**Supplementary Figure S1. The details of the 10 putative motifs.**

Supplement: Data_Sheet_1.zip [file Data_Sheet_1.zip]
